# Supplementary material for: Colchicine in Cardiac Surgery: The COCS Randomized Clinical Trial
Source: MDPI journal article supplement (doi:10.3390/jcdd9100363), 2022-10-20
Supplement: s1 [file s1]

| All patients n=240           |          |          |          |         |                |                |           |            |
|------------------------------|----------|----------|----------|---------|----------------|----------------|-----------|------------|
|                              | Mean     | Median   | Minimum  | Maximum | Lower Quartile | Upper Quartile | Std. Dev. | Std. Error |
| Grouping                     | 0,4708   | 0,0000   | 0,00000  | 1,000   | 0,0000         | 1,0000         | 0,5002    | 0,03229    |
| Age                          | 61,3333  | 62,0000  | 42,00000 | 80,000  | 55,0000        | 67,0000        | 8,3062    | 0,53616    |
| Male                         | 0,7500   | 1,0000   | 0,00000  | 1,000   | 0,5000         | 1,0000         | 0,4339    | 0,02801    |
| BSA                          | 2,0216   | 2,0200   | 1,53000  | 2,610   | 1,8900         | 2,1450         | 0,2000    | 0,01291    |
| Weight                       | 85,4667  | 85,0000  | 54,00000 | 129,000 | 75,0000        | 94,0000        | 14,6507   | 0,94570    |
| BMI                          | 29,3570  | 28,8700  | 20,00000 | 46,070  | 25,9850        | 32,0800        | 4,6032    | 0,29714    |
| Angina pectoris              | 0,8958   | 1,0000   | 0,00000  | 1,000   | 1,0000         | 1,0000         | 0,3061    | 0,01976    |
| Angina pectoris class III-IV | 0,5292   | 1,0000   | 0,00000  | 1,000   | 0,0000         | 1,0000         | 0,5002    | 0,03229    |
| Diabetes                     | 0,2167   | 0,0000   | 0,00000  | 1,000   | 0,0000         | 0,0000         | 0,4128    | 0,02665    |
| COPD                         | 0,0583   | 0,0000   | 0,00000  | 1,000   | 0,0000         | 0,0000         | 0,2349    | 0,01516    |
| Hypertension                 | 0,9125   | 1,0000   | 0,00000  | 1,000   | 1,0000         | 1,0000         | 0,2832    | 0,01828    |
| Prior AMI                    | 0,4042   | 0,0000   | 0,00000  | 1,000   | 0,0000         | 1,0000         | 0,4918    | 0,03174    |
| Stroke                       | 0,0167   | 0,0000   | 0,00000  | 1,000   | 0,0000         | 0,0000         | 0,1283    | 0,00828    |
| Smoking                      | 0,2750   | 0,0000   | 0,00000  | 1,000   | 0,0000         | 1,0000         | 0,4474    | 0,02888    |
| Beta-blockers                | 0,7458   | 1,0000   | 0,00000  | 1,000   | 0,0000         | 1,0000         | 0,4363    | 0,02816    |
| ACE inhibitors               | 0,5875   | 1,0000   | 0,00000  | 1,000   | 0,0000         | 1,0000         | 0,4933    | 0,03184    |
| Calcium antagonists          | 0,3458   | 0,0000   | 0,00000  | 1,000   | 0,0000         | 1,0000         | 0,4766    | 0,03077    |
| Thiazide diuretics           | 0,0875   | 0,0000   | 0,00000  | 1,000   | 0,0000         | 0,0000         | 0,2832    | 0,01828    |
| Loop diuretics               | 0,0958   | 0,0000   | 0,00000  | 1,000   | 0,0000         | 0,0000         | 0,2950    | 0,01904    |
| Potassium-sparing diuretics  | 0,1917   | 0,0000   | 0,00000  | 1,000   | 0,0000         | 0,0000         | 0,3944    | 0,02546    |
| NSAIDs                       | 0,0000   | 0,0000   | 0,00000  | 0,000   | 0,0000         | 0,0000         | 0,0000    | 0,00000    |
| Acetylsalicylic acid         | 0,3333   | 0,0000   | 0,00000  | 1,000   | 0,0000         | 1,0000         | 0,4724    | 0,03049    |
| Other antiaggregant          | 0,1833   | 0,0000   | 0,00000  | 1,000   | 0,0000         | 0,0000         | 0,3877    | 0,02503    |
| Nitrates                     | 0,2250   | 0,0000   | 0,00000  | 1,000   | 0,0000         | 0,0000         | 0,4185    | 0,02701    |
| Statins                      | 0,7417   | 1,0000   | 0,00000  | 1,000   | 0,0000         | 1,0000         | 0,4386    | 0,02831    |
| LMWHs/ UFH                   | 0,2333   | 0,0000   | 0,00000  | 1,000   | 0,0000         | 0,0000         | 0,4238    | 0,02736    |
| LVEF                         | 59,4067  | 60,0000  | 36,20000 | 77,000  | 56,0000        | 64,0000        | 6,4697    | 0,41762    |
| iESD                         | 16,6430  | 16,4948  | 1,66667  | 28,800  | 15,0000        | 18,0328        | 3,0292    | 0,20854    |
| iEDD                         | 24,5745  | 24,4000  | 14,00000 | 35,000  | 22,7498        | 26,5097        | 3,2689    | 0,22451    |
| iESV                         | 23,8167  | 21,8000  | 7,10000  | 69,900  | 18,6164        | 26,5297        | 9,0084    | 0,58271    |
| iEDV                         | 58,0413  | 56,1000  | 25,80000 | 126,779 | 48,1125        | 65,4680        | 15,4347   | 0,99630    |
| AV peak gradient             | 28,6625  | 8,0000   | 3,00000  | 143,000 | 6,0000         | 34,0000        | 37,1495   | 2,43898    |
| AV mean gradient             | 20,7716  | 5,5000   | 0,00000  | 94,000  | 3,0000         | 42,0000        | 24,0311   | 1,88806    |
| MR                           | 1,3080   | 1,5000   | 0,00000  | 2,500   | 1,0000         | 1,5000         | 0,5289    | 0,03436    |
| AR                           | 0,7058   | 0,0000   | 0,00000  | 3,000   | 0,0000         | 1,0000         | 0,8451    | 0,05621    |
| IVS                          | 13,3136  | 13,0000  | 7,00000  | 22,000  | 12,0000        | 15,0000        | 2,5689    | 0,16722    |
| LA size                      | 4,5519   | 4,0000   | 2,90000  | 43,000  | 3,8000         | 4,4000         | 4,3793    | 0,28387    |
| WBC                          | 7,6757   | 7,5235   | 3,69000  | 12,200  | 6,4100         | 9,0500         | 1,7848    | 0,11569    |
| Neutrophils                  | 4,5293   | 4,5000   | 1,84400  | 8,700   | 3,6320         | 5,3000         | 1,3468    | 0,08978    |
| Neutrophils, %               | 58,5961  | 58,7500  | 35,32000 | 89,000  | 53,1400        | 63,8000        | 8,1623    | 0,54295    |
| Platelets                    | 245,9861 | 245,8500 | 33,10000 | 398,000 | 204,0000       | 292,6000       | 62,0118   | 4,01963    |
| Creatinine                   | 86,2303  | 83,9000  | 59,90000 | 173,000 | 73,9000        | 94,1000        | 16,9088   | 1,09604    |
| eGFR                         | 94,5004  | 92,2927  | 47,00000 | 192,113 | 76,0000        | 107,5556       | 26,7219   | 1,73213    |
| Glucose                      | 6,0898   | 5,4900   | 2,80000  | 76,000  | 5,0000         | 6,1000         | 4,8026    | 0,31463    |
| AST                          | 24,8593  | 21,0000  | 10,00000 | 134,000 | 17,0000        | 26,2000        | 14,9022   | 0,98049    |

|                             |          |          |          |         |         |          |         |         |
|-----------------------------|----------|----------|----------|---------|---------|----------|---------|---------|
| ALT                         | 30,4563  | 23,0000  | 6,00000  | 199,000 | 17,0000 | 34,0000  | 25,0673 | 1,64931 |
| Potassium                   | 4,4512   | 4,4000   | 3,50000  | 5,900   | 4,1000  | 4,7000   | 0,4456  | 0,03097 |
| Intraoperative data         |          |          |          |         |         |          |         |         |
| CPB                         | 0,7750   | 1,0000   | 0,00000  | 1,000   | 1,0000  | 1,0000   | 0,4185  | 0,02701 |
| CPB time                    | 104,8824 | 105,0000 | 0,00000  | 215,000 | 80,0000 | 130,0000 | 39,8375 | 2,91321 |
| Cardioplegia                | 0,2708   | 0,0000   | 0,00000  | 1,000   | 0,0000  | 1,0000   | 0,4453  | 0,02875 |
| ACC time                    | 63,8254  | 63,0000  | 36,00000 | 127,000 | 56,0000 | 70,0000  | 13,4134 | 1,68994 |
| CABG                        | 0,8333   | 1,0000   | 0,00000  | 1,000   | 1,0000  | 1,0000   | 0,3735  | 0,02411 |
| AC - 1                      | 0,5833   | 1,0000   | 0,00000  | 1,000   | 0,0000  | 1,0000   | 0,4940  | 0,03189 |
| AC - 2                      | 0,0375   | 0,0000   | 0,00000  | 1,000   | 0,0000  | 0,0000   | 0,1904  | 0,01229 |
| AC - 3                      | 0,0042   | 0,0000   | 0,00000  | 1,000   | 0,0000  | 0,0000   | 0,0645  | 0,00417 |
| VC - 1                      | 0,3042   | 0,0000   | 0,00000  | 1,000   | 0,0000  | 1,0000   | 0,4610  | 0,02976 |
| VC - 2                      | 0,2875   | 0,0000   | 0,00000  | 1,000   | 0,0000  | 1,0000   | 0,4535  | 0,02928 |
| VC - 3                      | 0,1458   | 0,0000   | 0,00000  | 1,000   | 0,0000  | 0,0000   | 0,3537  | 0,02283 |
| VC - 4                      | 0,0167   | 0,0000   | 0,00000  | 1,000   | 0,0000  | 0,0000   | 0,1283  | 0,00828 |
| VC - 5+                     | 0,0000   | 0,0000   | 0,00000  | 0,000   | 0,0000  | 0,0000   | 0,0000  | 0,00000 |
| RCA                         | 0,4042   | 0,0000   | 0,00000  | 1,000   | 0,0000  | 1,0000   | 0,4918  | 0,03174 |
| AV repair                   | 0,2500   | 0,0000   | 0,00000  | 1,000   | 0,0000  | 0,5000   | 0,4339  | 0,02801 |
| ICU data                    |          |          |          |         |         |          |         |         |
| Cardiotonic support in ICU  | 0,3417   | 0,0000   | 0,00000  | 1,000   | 0,0000  | 1,0000   | 0,4753  | 0,03068 |
| Lung ventilation time       | 10,1719  | 8,5000   | 2,00000  | 34,400  | 5,8000  | 14,1000  | 5,8475  | 0,38145 |
| Beta-blockers               | 0,8792   | 1,0000   | 0,00000  | 1,000   | 1,0000  | 1,0000   | 0,3266  | 0,02108 |
| Statins                     | 0,7083   | 1,0000   | 0,00000  | 1,000   | 0,0000  | 1,0000   | 0,4555  | 0,02940 |
| ACE inhibitors              | 0,5667   | 1,0000   | 0,00000  | 1,000   | 0,0000  | 1,0000   | 0,4966  | 0,03205 |
| Calcium antagonists         | 0,2333   | 0,0000   | 0,00000  | 1,000   | 0,0000  | 0,0000   | 0,4238  | 0,02736 |
| Thiazide diuretics          | 0,1042   | 0,0000   | 0,00000  | 10,000  | 0,0000  | 0,0000   | 0,6858  | 0,04427 |
| Loop diuretics              | 0,1083   | 0,0000   | 0,00000  | 1,000   | 0,0000  | 0,0000   | 0,3115  | 0,02010 |
| Potassium-sparing diuretics | 0,3000   | 0,0000   | 0,00000  | 1,000   | 0,0000  | 1,0000   | 0,4592  | 0,02964 |
| NSAIDs                      | 0,3917   | 0,0000   | 0,00000  | 1,000   | 0,0000  | 1,0000   | 0,4891  | 0,03157 |
| Acetylsalicylic acid        | 0,7667   | 1,0000   | 0,00000  | 1,000   | 1,0000  | 1,0000   | 0,4238  | 0,02736 |
| Other antiaggregant         | 0,7125   | 1,0000   | 0,00000  | 1,000   | 0,0000  | 1,0000   | 0,4535  | 0,02928 |
| Nitrates                    | 0,0875   | 0,0000   | 0,00000  | 1,000   | 0,0000  | 0,0000   | 0,2832  | 0,01828 |
| Antiarrhythmic drugs        | 0,0458   | 0,0000   | 0,00000  | 1,000   | 0,0000  | 0,0000   | 0,2096  | 0,01353 |
| Cardiotonic support         | 0,4542   | 0,0000   | 0,00000  | 1,000   | 0,0000  | 1,0000   | 0,4989  | 0,03221 |
| Adrenaline                  | 0,0292   | 0,0000   | 0,00000  | 1,000   | 0,0000  | 0,0000   | 0,1686  | 0,01088 |
| Norepinephrine              | 0,2000   | 0,0000   | 0,00000  | 1,000   | 0,0000  | 0,0000   | 0,4008  | 0,02587 |
| Dopamine                    | 0,3625   | 0,0000   | 0,00000  | 1,000   | 0,0000  | 1,0000   | 0,4817  | 0,03110 |
| Dobutamine                  | 0,0083   | 0,0000   | 0,00000  | 1,000   | 0,0000  | 0,0000   | 0,0911  | 0,00588 |
| Lmwh/ UFH                   | 0,9292   | 1,0000   | 0,00000  | 1,000   | 1,0000  | 1,0000   | 0,2571  | 0,01659 |
| Warfarin                    | 0,2500   | 0,0000   | 0,00000  | 1,000   | 0,0000  | 0,5000   | 0,4339  | 0,02801 |
| Antibiotics                 | 0,9542   | 1,0000   | 0,00000  | 1,000   | 1,0000  | 1,0000   | 0,2096  | 0,01353 |
| Steroids                    | 0,7250   | 1,0000   | 0,00000  | 1,000   | 0,0000  | 1,0000   | 0,4474  | 0,02888 |
| 3 postoperative day         |          |          |          |         |         |          |         |         |
| LVEF                        | 54,4859  | 55,0000  | 28,90000 | 73,000  | 52,7000 | 57,0000  | 5,4019  | 0,35619 |
| iESV                        | 22,4921  | 20,0000  | 5,60000  | 67,000  | 16,7464 | 24,6575  | 10,2210 | 0,78623 |
| iEDV                        | 46,7437  | 44,4000  | 20,70000 | 105,769 | 39,7790 | 52,8000  | 12,8079 | 0,87553 |
| Pericardial effusion, n     | 0,1293   | 0,0000   | 0,00000  | 1,000   | 0,0000  | 0,0000   | 0,3363  | 0,02208 |

|                             |          |          |          |          |          |          |          |          |
|-----------------------------|----------|----------|----------|----------|----------|----------|----------|----------|
| Pericardial effusion, mm    | 5,4286   | 5,0000   | 2,00000  | 13,000   | 3,5000   | 5,0000   | 3,1790   | 0,60077  |
| Pleural effusion, n         | 0,4163   | 0,0000   | 0,00000  | 1,000    | 0,0000   | 1,0000   | 0,4940   | 0,03236  |
| Pleural effusion, mm        | 21,0426  | 18,5000  | 2,00000  | 60,000   | 15,0000  | 25,0000  | 10,7653  | 1,11035  |
| WBC                         | 12,3197  | 11,7000  | 5,20000  | 27,260   | 9,5260   | 14,4550  | 4,0202   | 0,25951  |
| Neutrophils                 | 34,0151  | 8,8000   | 3,43000  | 4874,000 | 6,7710   | 12,2300  | 342,2674 | 24,08185 |
| Neutrophils, %              | 76,5979  | 77,4900  | 10,70000 | 93,000   | 71,6600  | 83,8200  | 10,2607  | 0,72016  |
| Platelets                   | 202,1271 | 192,1000 | 17,10000 | 404,000  | 160,0000 | 244,0000 | 64,6155  | 4,21505  |
| Creatinine                  | 77,8910  | 73,0000  | 43,70000 | 196,0000 | 66,0000  | 85,8000  | 20,18079 | 1,322088 |
| eGFR                        | 106,2284 | 104,4281 | 36,20000 | 223,5028 | 85,5000  | 122,4959 | 30,78887 | 2,017046 |
| Glucose                     | 8,4328   | 6,8000   | 3,90000  | 99,0000  | 5,7000   | 8,4800   | 9,59515  | 0,680182 |
| AST                         | 37,2224  | 31,0000  | 3,00000  | 155,0000 | 22,8000  | 43,0000  | 23,96782 | 1,619595 |
| ALT                         | 26,2618  | 20,0000  | 1,30000  | 238,0000 | 13,5000  | 29,0000  | 26,89688 | 1,813388 |
| Potassium                   | 6,7943   | 4,1000   | 2,50000  | 464,0000 | 3,9000   | 4,4000   | 34,76508 | 2,627993 |
| Beta-blockers               | 0,8750   | 1,0000   | 0,00000  | 1,0000   | 1,0000   | 1,0000   | 0,33141  | 0,021392 |
| Statins                     | 0,7375   | 1,0000   | 0,00000  | 1,0000   | 0,0000   | 1,0000   | 0,44091  | 0,028461 |
| ACE inhibitors              | 0,5625   | 1,0000   | 0,00000  | 1,0000   | 0,0000   | 1,0000   | 0,49712  | 0,032089 |
| Calcium antagonists         | 0,2500   | 0,0000   | 0,00000  | 1,0000   | 0,0000   | 0,5000   | 0,43392  | 0,028009 |
| Thiazide diuretics          | 0,0708   | 0,0000   | 0,00000  | 1,0000   | 0,0000   | 0,0000   | 0,25708  | 0,016595 |
| Loop diuretics              | 0,1583   | 0,0000   | 0,00000  | 1,0000   | 0,0000   | 0,0000   | 0,36582  | 0,023613 |
| Potassium-sparing diuretics | 0,3542   | 0,0000   | 0,00000  | 1,0000   | 0,0000   | 1,0000   | 0,47926  | 0,030936 |
| NSAIDs                      | 0,4083   | 0,0000   | 0,00000  | 1,0000   | 0,0000   | 1,0000   | 0,49255  | 0,031794 |
| Acetylsalicylic acid        | 0,7792   | 1,0000   | 0,00000  | 1,0000   | 1,0000   | 1,0000   | 0,41568  | 0,026832 |
| Other antiaggregant         | 0,7000   | 1,0000   | 0,00000  | 1,0000   | 0,0000   | 1,0000   | 0,45922  | 0,029642 |
| Nitrates                    | 0,0333   | 0,0000   | 0,00000  | 1,0000   | 0,0000   | 0,0000   | 0,17988  | 0,011611 |
| Antiarrhythmic drugs        | 0,1083   | 0,0000   | 0,00000  | 1,0000   | 0,0000   | 0,0000   | 0,31145  | 0,020104 |
| Cardiotonic support         | 0,2333   | 0,0000   | 0,00000  | 1,0000   | 0,0000   | 0,0000   | 0,42384  | 0,027359 |
| Adrenaline                  | 0,0167   | 0,0000   | 0,00000  | 1,0000   | 0,0000   | 0,0000   | 0,12829  | 0,008281 |
| Norepinephrine              | 0,1000   | 0,0000   | 0,00000  | 1,0000   | 0,0000   | 0,0000   | 0,30063  | 0,019405 |
| Dopamine                    | 0,1708   | 0,0000   | 0,00000  | 1,0000   | 0,0000   | 0,0000   | 0,37715  | 0,024345 |
| Dobutamine                  | 0,0083   | 0,0000   | 0,00000  | 1,0000   | 0,0000   | 0,0000   | 0,09110  | 0,005880 |
| Lmwh/ UFH                   | 0,7958   | 1,0000   | 0,00000  | 1,0000   | 1,0000   | 1,0000   | 0,40393  | 0,026074 |
| Warfarin                    | 0,2542   | 0,0000   | 0,00000  | 1,0000   | 0,0000   | 1,0000   | 0,43630  | 0,028163 |
| Antibiotics                 | 0,5000   | 0,5000   | 0,00000  | 1,0000   | 0,0000   | 1,0000   | 0,50104  | 0,032342 |
| Steroids                    | 0,3667   | 0,0000   | 0,00000  | 1,0000   | 0,0000   | 1,0000   | 0,48290  | 0,031171 |
| 5 postoperative day         |          |          |          |          |          |          |          |          |
| LVEF                        | 55,3275  | 55,4000  | 31,60000 | 73,4000  | 54,0000  | 58,0000  | 5,09454  | 0,336657 |
| iESV                        | 21,2171  | 19,6000  | 9,30000  | 63,7000  | 16,4000  | 23,8000  | 8,50750  | 0,652496 |
| iEDV                        | 47,2153  | 45,0000  | 22,00000 | 113,9000 | 38,5000  | 53,5000  | 13,77959 | 0,953154 |
| Pericardial effusion, n     | 0,2130   | 0,0000   | 0,00000  | 1,0000   | 0,0000   | 0,0000   | 0,41035  | 0,027058 |
| Pericardial effusion, mm    | 5,9574   | 5,0000   | 2,00000  | 40,0000  | 4,0000   | 6,0000   | 5,59875  | 0,816661 |
| Pleural effusion, n         | 0,4526   | 0,0000   | 0,00000  | 2,0000   | 0,0000   | 1,0000   | 0,50743  | 0,033314 |
| Pleural effusion, mm        | 22,0408  | 20,0000  | 3,00000  | 65,0000  | 15,0000  | 28,0000  | 10,83515 | 1,094515 |
| WBC                         | 10,3843  | 9,8810   | 4,40000  | 24,4800  | 8,1250   | 12,0000  | 3,30999  | 0,222152 |

|                                                 |          |          |          |          |          |          |          |          |
|-------------------------------------------------|----------|----------|----------|----------|----------|----------|----------|----------|
| Neutrophils                                     | 6,7645   | 6,3800   | 1,90000  | 15,9000  | 4,8535   | 8,0000   | 2,61500  | 0,190719 |
| Neutrophils, %                                  | 63,4316  | 62,2500  | 35,11000 | 87,9500  | 57,3000  | 68,9000  | 9,69667  | 0,709091 |
| Platelets                                       | 265,1144 | 265,2000 | 25,10000 | 529,8000 | 212,0000 | 317,0000 | 82,06427 | 5,507793 |
| Creatinine                                      | 77,6058  | 77,0000  | 39,40000 | 124,3000 | 68,1000  | 85,5000  | 14,08298 | 0,976479 |
| eGFR                                            | 104,5269 | 101,5301 | 52,88889 | 211,7567 | 82,9668  | 121,2323 | 29,37493 | 2,036785 |
| Glucose                                         | 7,1826   | 5,9650   | 4,14000  | 85,0000  | 5,3100   | 7,4000   | 6,21743  | 0,460867 |
| AST                                             | 38,4200  | 28,0000  | 11,00000 | 627,0000 | 21,0000  | 38,0000  | 61,87316 | 4,321409 |
| ALT                                             | 37,7341  | 28,0000  | 3,60000  | 360,0000 | 18,0000  | 43,0000  | 41,01848 | 2,864855 |
| Potassium                                       | 4,2093   | 4,2000   | 1,00000  | 5,8000   | 3,9000   | 4,5000   | 0,55698  | 0,043896 |
| Beta-blockers                                   | 0,8958   | 1,0000   | 0,00000  | 1,0000   | 1,0000   | 1,0000   | 0,30612  | 0,019760 |
| Statins                                         | 0,7417   | 1,0000   | 0,00000  | 1,0000   | 0,0000   | 1,0000   | 0,43863  | 0,028314 |
| ACE inhibitors                                  | 0,5583   | 1,0000   | 0,00000  | 1,0000   | 0,0000   | 1,0000   | 0,49762  | 0,032121 |
| Calcium antagonists                             | 0,2542   | 0,0000   | 0,00000  | 1,0000   | 0,0000   | 1,0000   | 0,43630  | 0,028163 |
| Thiazide diuretics                              | 0,0667   | 0,0000   | 0,00000  | 1,0000   | 0,0000   | 0,0000   | 0,24997  | 0,016135 |
| Loop diuretics                                  | 0,1625   | 0,0000   | 0,00000  | 1,0000   | 0,0000   | 0,0000   | 0,36968  | 0,023863 |
| Potassium-sparing diuretics                     | 0,3583   | 0,0000   | 0,00000  | 1,0000   | 0,0000   | 1,0000   | 0,48051  | 0,031017 |
| NSAIDs                                          | 0,3500   | 0,0000   | 0,00000  | 1,0000   | 0,0000   | 1,0000   | 0,47797  | 0,030853 |
| Acetylsalicylic acid                            | 0,8000   | 1,0000   | 0,00000  | 1,0000   | 1,0000   | 1,0000   | 0,40084  | 0,025874 |
| Other antiaggregant                             | 0,7292   | 1,0000   | 0,00000  | 1,0000   | 0,0000   | 1,0000   | 0,44532  | 0,028745 |
| Nitrates                                        | 0,0292   | 0,0000   | 0,00000  | 1,0000   | 0,0000   | 0,0000   | 0,16863  | 0,010885 |
| Antiarrhythmic drugs                            | 0,1167   | 0,0000   | 0,00000  | 1,0000   | 0,0000   | 0,0000   | 0,32169  | 0,020765 |
| Cardiotonic support                             | 0,0542   | 0,0000   | 0,00000  | 1,0000   | 0,0000   | 0,0000   | 0,22682  | 0,014641 |
| Adrenaline                                      | 0,0042   | 0,0000   | 0,00000  | 1,0000   | 0,0000   | 0,0000   | 0,06455  | 0,004167 |
| Norepinephrine                                  | 0,0167   | 0,0000   | 0,00000  | 1,0000   | 0,0000   | 0,0000   | 0,12829  | 0,008281 |
| Dopamine                                        | 0,0375   | 0,0000   | 0,00000  | 1,0000   | 0,0000   | 0,0000   | 0,19038  | 0,012289 |
| Dobutamine                                      | 0,0083   | 0,0000   | 0,00000  | 1,0000   | 0,0000   | 0,0000   | 0,09110  | 0,005880 |
| Lmwh/ UFH                                       | 0,6208   | 1,0000   | 0,00000  | 1,0000   | 0,0000   | 1,0000   | 0,48619  | 0,031384 |
| Warfarin                                        | 0,2625   | 0,0000   | 0,00000  | 1,0000   | 0,0000   | 1,0000   | 0,44091  | 0,028461 |
| Antibiotics                                     | 0,3333   | 0,0000   | 0,00000  | 1,0000   | 0,0000   | 1,0000   | 0,47239  | 0,030493 |
| Steroids                                        | 0,1333   | 0,0000   | 0,00000  | 1,0000   | 0,0000   | 0,0000   | 0,34065  | 0,021989 |
| Outcomes                                        |          |          |          |          |          |          |          |          |
| POAF                                            | 0,2500   | 0,0000   | 0,00000  | 1,0000   | 0,0000   | 0,5000   | 0,43392  | 0,028009 |
| POAF day                                        | 6,2833   | 7,0000   | 1,00000  | 15,0000  | 5,0000   | 7,0000   | 2,85840  | 0,184509 |
| Effective management of POAF                    | 0,9667   | 1,0000   | 0,00000  | 1,0000   | 1,0000   | 1,0000   | 0,18102  | 0,023370 |
| Hospital mortality                              | 0,0000   | 0,0000   | 0,00000  | 0,0000   | 0,0000   | 0,0000   | 0,00000  | 0,000000 |
| LOS                                             | 7,7167   | 7,0000   | 5,00000  | 15,000   | 6,0000   | 8,0000   | 2,0195   | 0,13036  |
| Respiratory failure                             | 0,0000   | 0,0000   | 0,00000  | 0,0000   | 0,0000   | 0,0000   | 0,00000  | 0,000000 |
| Stroke                                          | 0,0000   | 0,0000   | 0,00000  | 0,0000   | 0,0000   | 0,0000   | 0,00000  | 0,000000 |
| Bleeding                                        | 0,0000   | 0,0000   | 0,00000  | 0,0000   | 0,0000   | 0,0000   | 0,00000  | 0,000000 |
| VESs                                            | 0,0042   | 0,0000   | 0,00000  | 1,0000   | 0,0000   | 0,0000   | 0,06455  | 0,004167 |
| Infectious complications of postoperative wound | 0,0000   | 0,0000   | 0,00000  | 0,0000   | 0,0000   | 0,0000   | 0,00000  | 0,000000 |

|                             |        |        |         |        |        |        |         |          |
|-----------------------------|--------|--------|---------|--------|--------|--------|---------|----------|
| Arrhythmias, except AF      | 0,0333 | 0,0000 | 0,00000 | 1,0000 | 0,0000 | 0,0000 | 0,17988 | 0,011611 |
| Pericardial puncture        | 0,0042 | 0,0000 | 0,00000 | 1,0000 | 0,0000 | 0,0000 | 0,06455 | 0,004167 |
| SVESs                       | 0,0208 | 0,0000 | 0,00000 | 1,0000 | 0,0000 | 0,0000 | 0,14312 | 0,009239 |
| AV-block                    | 0,0125 | 0,0000 | 0,00000 | 1,0000 | 0,0000 | 0,0000 | 0,11133 | 0,007187 |
| Pacemaker implantation      | 0,0125 | 0,0000 | 0,00000 | 1,0000 | 0,0000 | 0,0000 | 0,11133 | 0,007187 |
| Nausea                      | 0,1208 | 0,0000 | 0,00000 | 1,0000 | 0,0000 | 0,0000 | 0,32661 | 0,021083 |
| Vomiting                    | 0,0333 | 0,0000 | 0,00000 | 1,0000 | 0,0000 | 0,0000 | 0,17988 | 0,011611 |
| Lack of appetite            | 0,1792 | 0,0000 | 0,00000 | 1,0000 | 0,0000 | 0,0000 | 0,38429 | 0,024806 |
| Diarrhea                    | 0,1833 | 0,0000 | 0,00000 | 1,0000 | 0,0000 | 0,0000 | 0,38775 | 0,025029 |
| Abdominal pain              | 0,0417 | 0,0000 | 0,00000 | 1,0000 | 0,0000 | 0,0000 | 0,20024 | 0,012926 |
| Convulsions                 | 0,0375 | 0,0000 | 0,00000 | 1,0000 | 0,0000 | 0,0000 | 0,19038 | 0,012289 |
| Tingling in the extremities | 0,0792 | 0,0000 | 0,00000 | 1,0000 | 0,0000 | 0,0000 | 0,27056 | 0,017465 |
| Skin rashes                 | 0,0000 | 0,0000 | 0,00000 | 0,0000 | 0,0000 | 0,0000 | 0,00000 | 0,000000 |



| Placebo n=127                |          |          |          |          |                |                |           |            |
|------------------------------|----------|----------|----------|----------|----------------|----------------|-----------|------------|
|                              | Mean     | Median   | Minimum  | Maximum  | Lower Quartile | Upper Quartile | Std. Dev. | Std. Error |
| Age                          | 61,5984  | 61,0000  | 43,0000  | 80,0000  | 56,0000        | 67,0000        | 8,26377   | 0,733291   |
| Male                         | 0,7638   | 1,0000   | 0,0000   | 1,0000   | 1,0000         | 1,0000         | 0,42644   | 0,037841   |
| BSA                          | 2,0223   | 2,0200   | 1,6000   | 2,6100   | 1,8900         | 2,1300         | 0,18705   | 0,016598   |
| Weight                       | 85,6614  | 85,0000  | 59,0000  | 129,0000 | 76,0000        | 94,0000        | 14,11192  | 1,252231   |
| BMI                          | 29,5114  | 29,0000  | 20,0000  | 46,0700  | 26,0000        | 32,3000        | 4,95420   | 0,439614   |
| Angina pectoris              | 0,8819   | 1,0000   | 0,0000   | 1,0000   | 1,0000         | 1,0000         | 0,32402   | 0,028752   |
| Angina pectoris class III-IV | 0,5354   | 1,0000   | 0,0000   | 1,0000   | 0,0000         | 1,0000         | 0,50072   | 0,044432   |
| Diabetes                     | 0,1890   | 0,0000   | 0,0000   | 1,0000   | 0,0000         | 0,0000         | 0,39304   | 0,034877   |
| COPD                         | 0,0551   | 0,0000   | 0,0000   | 1,0000   | 0,0000         | 0,0000         | 0,22911   | 0,020331   |
| Hypertension                 | 0,9370   | 1,0000   | 0,0000   | 1,0000   | 1,0000         | 1,0000         | 0,24391   | 0,021644   |
| Prior AMI                    | 0,4016   | 0,0000   | 0,0000   | 1,0000   | 0,0000         | 1,0000         | 0,49216   | 0,043672   |
| Stroke                       | 0,0157   | 0,0000   | 0,0000   | 1,0000   | 0,0000         | 0,0000         | 0,12499   | 0,011091   |
| Smoking                      | 0,3228   | 0,0000   | 0,0000   | 1,0000   | 0,0000         | 1,0000         | 0,46941   | 0,041654   |
| Beta-blockers                | 0,7480   | 1,0000   | 0,0000   | 1,0000   | 0,0000         | 1,0000         | 0,43586   | 0,038677   |
| ACE inhibitors               | 0,5669   | 1,0000   | 0,0000   | 1,0000   | 0,0000         | 1,0000         | 0,49746   | 0,044143   |
| Calcium antagonists          | 0,3622   | 0,0000   | 0,0000   | 1,0000   | 0,0000         | 1,0000         | 0,48254   | 0,042819   |
| Thiazide diuretics           | 0,0551   | 0,0000   | 0,0000   | 1,0000   | 0,0000         | 0,0000         | 0,22911   | 0,020331   |
| Loop diuretics               | 0,0787   | 0,0000   | 0,0000   | 1,0000   | 0,0000         | 0,0000         | 0,27040   | 0,023994   |
| Potassium-sparing diuretics  | 0,1732   | 0,0000   | 0,0000   | 1,0000   | 0,0000         | 0,0000         | 0,37994   | 0,033715   |
| NSAIDs                       | 0,0000   | 0,0000   | 0,0000   | 0,0000   | 0,0000         | 0,0000         | 0,00000   | 0,000000   |
| Acetylsalicylic acid         | 0,3465   | 0,0000   | 0,0000   | 1,0000   | 0,0000         | 1,0000         | 0,47773   | 0,042391   |
| Other antiaggregant          | 0,1732   | 0,0000   | 0,0000   | 1,0000   | 0,0000         | 0,0000         | 0,37994   | 0,033715   |
| Nitrates                     | 0,1969   | 0,0000   | 0,0000   | 1,0000   | 0,0000         | 0,0000         | 0,39919   | 0,035423   |
| Statins                      | 0,7953   | 1,0000   | 0,0000   | 1,0000   | 1,0000         | 1,0000         | 0,40510   | 0,035947   |
| LMWHs/ UFH                   | 0,2283   | 0,0000   | 0,0000   | 1,0000   | 0,0000         | 0,0000         | 0,42143   | 0,037396   |
| LVEF                         | 59,9220  | 60,0000  | 40,0000  | 77,0000  | 56,0000        | 64,0000        | 6,27975   | 0,557237   |
| iESD                         | 16,3907  | 16,4948  | 1,6667   | 24,0000  | 14,9419        | 18,0000        | 3,09467   | 0,292418   |
| iEDD                         | 24,4200  | 24,1860  | 14,0000  | 34,1346  | 22,7273        | 26,2376        | 3,17029   | 0,298235   |
| iESV                         | 23,3099  | 21,5122  | 7,1000   | 56,8269  | 18,4000        | 26,1000        | 8,51763   | 0,755818   |
| iEDV                         | 57,4637  | 55,8416  | 25,8000  | 126,7788 | 46,8000        | 64,4279        | 15,26694  | 1,354722   |
| AV peak gradient             | 28,2008  | 9,0000   | 3,0000   | 143,0000 | 6,0000         | 26,0000        | 38,11945  | 3,451173   |
| AV mean gradient             | 22,0064  | 5,0000   | 0,0000   | 94,0000  | 3,0000         | 45,0000        | 25,92039  | 2,934907   |
| MR                           | 1,2760   | 1,5000   | 0,0000   | 2,5000   | 1,0000         | 1,5000         | 0,57311   | 0,051260   |
| AR                           | 0,6807   | 0,0000   | 0,0000   | 3,0000   | 0,0000         | 1,0000         | 0,85055   | 0,077970   |
| IVS                          | 13,3333  | 13,0000  | 9,0000   | 21,0000  | 12,0000        | 15,0000        | 2,36666   | 0,213395   |
| LA size                      | 4,9713   | 4,0000   | 2,9000   | 43,0000  | 3,7000         | 4,4000         | 5,95840   | 0,528722   |
| WBC                          | 7,7388   | 7,6020   | 4,1000   | 12,2000  | 6,5750         | 9,0650         | 1,69069   | 0,151220   |
| Neutrophils                  | 4,5391   | 4,7000   | 1,8440   | 8,7000   | 3,7170         | 5,2700         | 1,21379   | 0,110803   |
| Neutrophils, %               | 58,4017  | 58,9000  | 41,0300  | 82,0000  | 53,1500        | 62,9600        | 7,69502   | 0,699548   |
| Platelets                    | 248,8720 | 257,8000 | 103,0000 | 373,0000 | 213,0000       | 297,8000       | 59,56150  | 5,327343   |
| Creatinine                   | 86,3920  | 84,0000  | 60,0000  | 173,0000 | 74,0000        | 95,0000        | 17,70630  | 1,583700   |
| eGFR                         | 94,6062  | 89,3883  | 47,0000  | 166,8741 | 75,5041        | 109,7609       | 26,41698  | 2,362806   |
| Glucose                      | 6,3574   | 5,4000   | 4,0800   | 76,0000  | 4,9200         | 5,8100         | 6,57692   | 0,597902   |
| AST                          | 24,6855  | 20,0000  | 11,8000  | 134,0000 | 17,0000        | 26,0000        | 15,31503  | 1,375330   |
| ALT                          | 31,5242  | 24,5000  | 8,0000   | 199,0000 | 18,0000        | 34,0000        | 26,48473  | 2,378399   |

|                             |          |          |         |          |         |          |          |          |
|-----------------------------|----------|----------|---------|----------|---------|----------|----------|----------|
| Potassium                   | 4,4434   | 4,4000   | 3,5000  | 5,9000   | 4,1000  | 4,7000   | 0,43425  | 0,042178 |
| Intraoperative data         |          |          |         |          |         |          |          |          |
| CPB                         | 0,7874   | 1,0000   | 0,0000  | 1,0000   | 1,0000  | 1,0000   | 0,41077  | 0,036450 |
| CPB time                    | 107,4600 | 108,0000 | 25,0000 | 190,0000 | 80,0000 | 130,5000 | 37,32641 | 3,732641 |
| Cardioplegia                | 0,2598   | 0,0000   | 0,0000  | 1,0000   | 0,0000  | 1,0000   | 0,44028  | 0,039069 |
| ACC time                    | 62,8710  | 63,0000  | 36,0000 | 95,0000  | 54,0000 | 70,0000  | 13,24825 | 2,379456 |
| CABG                        | 0,8504   | 1,0000   | 0,0000  | 1,0000   | 1,0000  | 1,0000   | 0,35810  | 0,031776 |
| AC - 1                      | 0,6063   | 1,0000   | 0,0000  | 1,0000   | 0,0000  | 1,0000   | 0,49050  | 0,043525 |
| AC - 2                      | 0,0394   | 0,0000   | 0,0000  | 1,0000   | 0,0000  | 0,0000   | 0,19524  | 0,017325 |
| AC - 3                      | 0,0079   | 0,0000   | 0,0000  | 1,0000   | 0,0000  | 0,0000   | 0,08874  | 0,007874 |
| VC - 1                      | 0,2677   | 0,0000   | 0,0000  | 1,0000   | 0,0000  | 1,0000   | 0,44452  | 0,039445 |
| VC - 2                      | 0,2677   | 0,0000   | 0,0000  | 1,0000   | 0,0000  | 1,0000   | 0,44452  | 0,039445 |
| VC - 3                      | 0,2047   | 0,0000   | 0,0000  | 1,0000   | 0,0000  | 0,0000   | 0,40510  | 0,035947 |
| VC - 4                      | 0,0079   | 0,0000   | 0,0000  | 1,0000   | 0,0000  | 0,0000   | 0,08874  | 0,007874 |
| VC - 5+                     | 0,0000   | 0,0000   | 0,0000  | 0,0000   | 0,0000  | 0,0000   | 0,00000  | 0,000000 |
| RCA                         | 0,4724   | 0,0000   | 0,0000  | 1,0000   | 0,0000  | 1,0000   | 0,50122  | 0,044476 |
| AV repair                   | 0,2205   | 0,0000   | 0,0000  | 1,0000   | 0,0000  | 0,0000   | 0,41621  | 0,036932 |
| ICU data                    |          |          |         |          |         |          |          |          |
| Cardiotonic support in ICU  | 0,2677   | 0,0000   | 0,0000  | 1,0000   | 0,0000  | 1,0000   | 0,44452  | 0,039445 |
| Lung ventilation time       | 10,3394  | 8,6000   | 2,0000  | 29,2000  | 5,8000  | 14,8000  | 5,96869  | 0,529636 |
| Beta-blockers               | 0,8819   | 1,0000   | 0,0000  | 1,0000   | 1,0000  | 1,0000   | 0,32402  | 0,028752 |
| Statins                     | 0,7087   | 1,0000   | 0,0000  | 1,0000   | 0,0000  | 1,0000   | 0,45618  | 0,040479 |
| ACE inhibitors              | 0,5433   | 1,0000   | 0,0000  | 1,0000   | 0,0000  | 1,0000   | 0,50009  | 0,044376 |
| Calcium antagonists         | 0,2362   | 0,0000   | 0,0000  | 1,0000   | 0,0000  | 0,0000   | 0,42644  | 0,037841 |
| Thiazide diuretics          | 0,1339   | 0,0000   | 0,0000  | 10,0000  | 0,0000  | 0,0000   | 0,91167  | 0,080898 |
| Loop diuretics              | 0,1024   | 0,0000   | 0,0000  | 1,0000   | 0,0000  | 0,0000   | 0,30432  | 0,027004 |
| Potassium-sparing diuretics | 0,2441   | 0,0000   | 0,0000  | 1,0000   | 0,0000  | 0,0000   | 0,43125  | 0,038267 |
| NSAIDs                      | 0,3780   | 0,0000   | 0,0000  | 1,0000   | 0,0000  | 1,0000   | 0,48680  | 0,043196 |
| Acetylsalicylic acid        | 0,7402   | 1,0000   | 0,0000  | 1,0000   | 0,0000  | 1,0000   | 0,44028  | 0,039069 |
| Other antiaggregant         | 0,7559   | 1,0000   | 0,0000  | 1,0000   | 1,0000  | 1,0000   | 0,43125  | 0,038267 |
| Nitrates                    | 0,1181   | 0,0000   | 0,0000  | 1,0000   | 0,0000  | 0,0000   | 0,32402  | 0,028752 |
| Antiarrhythmic drugs        | 0,0394   | 0,0000   | 0,0000  | 1,0000   | 0,0000  | 0,0000   | 0,19524  | 0,017325 |
| Cardiotonic support         | 0,4646   | 0,0000   | 0,0000  | 1,0000   | 0,0000  | 1,0000   | 0,50072  | 0,044432 |
| Adrenaline                  | 0,0236   | 0,0000   | 0,0000  | 1,0000   | 0,0000  | 0,0000   | 0,15247  | 0,013530 |
| Norepinephrine              | 0,1890   | 0,0000   | 0,0000  | 1,0000   | 0,0000  | 0,0000   | 0,39304  | 0,034877 |
| Dopamine                    | 0,3780   | 0,0000   | 0,0000  | 1,0000   | 0,0000  | 1,0000   | 0,48680  | 0,043196 |
| Dobutamine                  | 0,0000   | 0,0000   | 0,0000  | 0,0000   | 0,0000  | 0,0000   | 0,00000  | 0,000000 |
| Lmwh/ UFH                   | 0,9213   | 1,0000   | 0,0000  | 1,0000   | 1,0000  | 1,0000   | 0,27040  | 0,023994 |
| Warfarin                    | 0,2283   | 0,0000   | 0,0000  | 1,0000   | 0,0000  | 0,0000   | 0,42143  | 0,037396 |
| Antibiotics                 | 0,9449   | 1,0000   | 0,0000  | 1,0000   | 1,0000  | 1,0000   | 0,22911  | 0,020331 |
| Steroids                    | 0,7717   | 1,0000   | 0,0000  | 1,0000   | 1,0000  | 1,0000   | 0,42143  | 0,037396 |
| 3 postoperative day         |          |          |         |          |         |          |          |          |
| LVEF                        | 54,9429  | 55,0000  | 39,0000 | 73,0000  | 53,0000 | 57,0000  | 4,84602  | 0,431718 |
| iESV                        | 21,8383  | 20,1275  | 5,6000  | 53,8462  | 17,3099 | 23,8191  | 8,28994  | 0,855042 |
| iEDV                        | 45,6399  | 44,4000  | 20,7000 | 105,7692 | 39,4000 | 51,2000  | 11,38245 | 1,066064 |
| Pericardial effusion, n     | 0,1587   | 0,0000   | 0,0000  | 1,0000   | 0,0000  | 0,0000   | 0,36688  | 0,032685 |

|                             |          |          |          |          |          |          |          |          |
|-----------------------------|----------|----------|----------|----------|----------|----------|----------|----------|
| Pericardial effusion, mm    | 6,2500   | 5,0000   | 2,0000   | 13,0000  | 5,0000   | 9,0000   | 3,38534  | 0,756985 |
| Pleural effusion, n         | 0,4048   | 0,0000   | 0,0000   | 1,0000   | 0,0000   | 1,0000   | 0,49281  | 0,043903 |
| Pleural effusion, mm        | 22,4898  | 20,0000  | 2,0000   | 47,0000  | 15,0000  | 26,0000  | 10,50421 | 1,500601 |
| WBC                         | 12,5885  | 12,0000  | 5,2000   | 27,2600  | 9,6000   | 14,6000  | 4,19723  | 0,372444 |
| Neutrophils                 | 10,3676  | 8,9300   | 4,2000   | 49,0000  | 6,7890   | 12,7000  | 5,61350  | 0,555820 |
| Neutrophils, %              | 76,7157  | 78,9800  | 10,7000  | 92,1300  | 72,0000  | 82,8300  | 10,08423 | 0,993628 |
| Platelets                   | 204,6919 | 199,0000 | 17,1000  | 404,0000 | 162,0000 | 254,0000 | 67,74974 | 6,108788 |
| Creatinine                  | 80,3750  | 75,0000  | 46,70000 | 196,0000 | 66,7000  | 88,5000  | 22,24657 | 1,997801 |
| eGFR                        | 103,7676 | 100,0465 | 36,20000 | 223,5028 | 83,7336  | 124,1149 | 31,99815 | 2,873519 |
| Glucose                     | 7,5327   | 6,6200   | 4,15000  | 28,0000  | 5,7000   | 8,3000   | 3,28504  | 0,323685 |
| AST                         | 37,9042  | 31,0000  | 3,00000  | 155,0000 | 21,0000  | 40,0000  | 27,53081 | 2,534416 |
| ALT                         | 27,8588  | 21,0000  | 1,30000  | 238,0000 | 13,0000  | 29,0000  | 33,19785 | 3,043242 |
| Potassium                   | 9,2707   | 4,2000   | 2,50000  | 464,0000 | 3,9000   | 4,5000   | 47,93446 | 4,997513 |
| Beta-blockers               | 0,8898   | 1,0000   | 0,00000  | 1,0000   | 1,0000   | 1,0000   | 0,31442  | 0,027901 |
| Statins                     | 0,7323   | 1,0000   | 0,00000  | 1,0000   | 0,0000   | 1,0000   | 0,44452  | 0,039445 |
| ACE inhibitors              | 0,5512   | 1,0000   | 0,00000  | 1,0000   | 0,0000   | 1,0000   | 0,49934  | 0,044310 |
| Calcium antagonists         | 0,2362   | 0,0000   | 0,00000  | 1,0000   | 0,0000   | 0,0000   | 0,42644  | 0,037841 |
| Thiazide diuretics          | 0,0630   | 0,0000   | 0,00000  | 1,0000   | 0,0000   | 0,0000   | 0,24391  | 0,021644 |
| Loop diuretics              | 0,1654   | 0,0000   | 0,00000  | 1,0000   | 0,0000   | 0,0000   | 0,37297  | 0,033096 |
| Potassium-sparing diuretics | 0,3071   | 0,0000   | 0,00000  | 1,0000   | 0,0000   | 1,0000   | 0,46311  | 0,041095 |
| NSAIDs                      | 0,3858   | 0,0000   | 0,00000  | 1,0000   | 0,0000   | 1,0000   | 0,48872  | 0,043367 |
| Acetylsalicylic acid        | 0,7795   | 1,0000   | 0,00000  | 1,0000   | 1,0000   | 1,0000   | 0,41621  | 0,036932 |
| Other antiaggregant         | 0,7402   | 1,0000   | 0,00000  | 1,0000   | 0,0000   | 1,0000   | 0,44028  | 0,039069 |
| Nitrates                    | 0,0551   | 0,0000   | 0,00000  | 1,0000   | 0,0000   | 0,0000   | 0,22911  | 0,020331 |
| Antiarrhythmic drugs        | 0,1102   | 0,0000   | 0,00000  | 1,0000   | 0,0000   | 0,0000   | 0,31442  | 0,027901 |
| Cardiotonic support         | 0,2126   | 0,0000   | 0,00000  | 1,0000   | 0,0000   | 0,0000   | 0,41077  | 0,036450 |
| Adrenaline                  | 0,0236   | 0,0000   | 0,00000  | 1,0000   | 0,0000   | 0,0000   | 0,15247  | 0,013530 |
| Norepinephrine              | 0,0787   | 0,0000   | 0,00000  | 1,0000   | 0,0000   | 0,0000   | 0,27040  | 0,023994 |
| Dopamine                    | 0,1496   | 0,0000   | 0,00000  | 1,0000   | 0,0000   | 0,0000   | 0,35810  | 0,031776 |
| Dobutamine                  | 0,0000   | 0,0000   | 0,00000  | 0,0000   | 0,0000   | 0,0000   | 0,00000  | 0,000000 |
| Lmwh/ UFH                   | 0,7874   | 1,0000   | 0,00000  | 1,0000   | 1,0000   | 1,0000   | 0,41077  | 0,036450 |
| Warfarin                    | 0,2362   | 0,0000   | 0,00000  | 1,0000   | 0,0000   | 0,0000   | 0,42644  | 0,037841 |
| Antibiotics                 | 0,5433   | 1,0000   | 0,00000  | 1,0000   | 0,0000   | 1,0000   | 0,50009  | 0,044376 |
| Steroids                    | 0,4331   | 0,0000   | 0,00000  | 1,0000   | 0,0000   | 1,0000   | 0,49746  | 0,044143 |
| 5 postoperative day         |          |          |          |          |          |          |          |          |
| LVEF                        | 55,8467  | 55,2000  | 43,20000 | 73,4000  | 54,0000  | 58,0000  | 4,61797  | 0,418091 |
| iESV                        | 20,7472  | 19,6000  | 9,70000  | 57,2000  | 16,6000  | 23,8000  | 6,70978  | 0,711235 |
| iEDV                        | 46,3694  | 45,0000  | 22,00000 | 113,9000 | 38,5000  | 53,9000  | 11,56333 | 1,097543 |
| Pericardial effusion, n     | 0,2213   | 0,0000   | 0,00000  | 1,0000   | 0,0000   | 0,0000   | 0,41684  | 0,037739 |
| Pericardial effusion, mm    | 5,6800   | 5,0000   | 4,00000  | 15,0000  | 5,0000   | 6,0000   | 2,23084  | 0,446169 |
| Pleural effusion, n         | 0,4715   | 0,0000   | 0,00000  | 1,0000   | 0,0000   | 1,0000   | 0,50123  | 0,045195 |
| Pleural effusion, mm        | 24,2222  | 20,0000  | 10,00000 | 65,0000  | 15,0000  | 32,0000  | 11,72108 | 1,595037 |



|                                                 |          |          |          |          |          |          |          |          |
|-------------------------------------------------|----------|----------|----------|----------|----------|----------|----------|----------|
| WBC                                             | 11,0789  | 10,9300  | 4,40000  | 24,4800  | 8,4000   | 13,2000  | 3,68177  | 0,349458 |
| Neutrophils                                     | 7,2641   | 6,8300   | 1,90000  | 15,9000  | 5,0000   | 9,4000   | 2,85973  | 0,288876 |
| Neutrophils, %                                  | 63,3685  | 62,9800  | 35,11000 | 87,0500  | 57,0000  | 68,3900  | 10,18030 | 1,028366 |
| Platelets                                       | 267,1928 | 262,3000 | 25,10000 | 445,0000 | 217,6000 | 329,2000 | 81,47362 | 7,733134 |
| Creatinine                                      | 78,2373  | 77,2000  | 58,70000 | 124,3000 | 68,2000  | 86,0000  | 13,28917 | 1,315824 |
| eGFR                                            | 104,5843 | 100,0776 | 59,53201 | 211,7567 | 82,0000  | 127,0646 | 30,67446 | 3,037224 |
| Glucose                                         | 7,4896   | 5,9200   | 4,20000  | 85,0000  | 5,3350   | 7,3000   | 8,26083  | 0,843118 |
| AST                                             | 45,0850  | 29,0000  | 14,00000 | 627,0000 | 20,0000  | 38,0000  | 86,03496 | 8,603496 |
| ALT                                             | 42,9560  | 27,0000  | 3,60000  | 360,0000 | 17,3500  | 46,0000  | 54,69482 | 5,469482 |
| Potassium                                       | 4,2952   | 4,3000   | 1,00000  | 5,8000   | 4,0000   | 4,6000   | 0,62350  | 0,068438 |
| Beta-blockers                                   | 0,9055   | 1,0000   | 0,00000  | 1,0000   | 1,0000   | 1,0000   | 0,29367  | 0,026059 |
| Statins                                         | 0,7402   | 1,0000   | 0,00000  | 1,0000   | 0,0000   | 1,0000   | 0,44028  | 0,039069 |
| ACE inhibitors                                  | 0,5354   | 1,0000   | 0,00000  | 1,0000   | 0,0000   | 1,0000   | 0,50072  | 0,044432 |
| Calcium antagonists                             | 0,2598   | 0,0000   | 0,00000  | 1,0000   | 0,0000   | 1,0000   | 0,44028  | 0,039069 |
| Thiazide diuretics                              | 0,0551   | 0,0000   | 0,00000  | 1,0000   | 0,0000   | 0,0000   | 0,22911  | 0,020331 |
| Loop diuretics                                  | 0,1496   | 0,0000   | 0,00000  | 1,0000   | 0,0000   | 0,0000   | 0,35810  | 0,031776 |
| Potassium-sparing diuretics                     | 0,2913   | 0,0000   | 0,00000  | 1,0000   | 0,0000   | 1,0000   | 0,45618  | 0,040479 |
| NSAIDs                                          | 0,3150   | 0,0000   | 0,00000  | 1,0000   | 0,0000   | 1,0000   | 0,46634  | 0,041381 |
| Acetylsalicylic acid                            | 0,7795   | 1,0000   | 0,00000  | 1,0000   | 1,0000   | 1,0000   | 0,41621  | 0,036932 |
| Other antiaggregant                             | 0,7638   | 1,0000   | 0,00000  | 1,0000   | 1,0000   | 1,0000   | 0,42644  | 0,037841 |
| Nitrates                                        | 0,0551   | 0,0000   | 0,00000  | 1,0000   | 0,0000   | 0,0000   | 0,22911  | 0,020331 |
| Antiarrhythmic drugs                            | 0,1496   | 0,0000   | 0,00000  | 1,0000   | 0,0000   | 0,0000   | 0,35810  | 0,031776 |
| Cardiotonic support                             | 0,0236   | 0,0000   | 0,00000  | 1,0000   | 0,0000   | 0,0000   | 0,15247  | 0,013530 |
| Adrenaline                                      | 0,0000   | 0,0000   | 0,00000  | 0,0000   | 0,0000   | 0,0000   | 0,00000  | 0,000000 |
| Norepinephrine                                  | 0,0079   | 0,0000   | 0,00000  | 1,0000   | 0,0000   | 0,0000   | 0,08874  | 0,007874 |
| Dopamine                                        | 0,0157   | 0,0000   | 0,00000  | 1,0000   | 0,0000   | 0,0000   | 0,12499  | 0,011091 |
| Dobutamine                                      | 0,0000   | 0,0000   | 0,00000  | 0,0000   | 0,0000   | 0,0000   | 0,00000  | 0,000000 |
| Lmwh/ UFH                                       | 0,5906   | 1,0000   | 0,00000  | 1,0000   | 0,0000   | 1,0000   | 0,49368  | 0,043807 |
| Warfarin                                        | 0,2520   | 0,0000   | 0,00000  | 1,0000   | 0,0000   | 1,0000   | 0,43586  | 0,038677 |
| Antibiotics                                     | 0,3701   | 0,0000   | 0,00000  | 1,0000   | 0,0000   | 1,0000   | 0,48474  | 0,043014 |
| Steroids                                        | 0,1102   | 0,0000   | 0,00000  | 1,0000   | 0,0000   | 0,0000   | 0,31442  | 0,027901 |
| Outcomes                                        |          |          |          |          |          |          |          |          |
| POAF                                            | 0,3071   | 0,0000   | 0,00000  | 1,0000   | 0,0000   | 1,0000   | 0,46311  | 0,041095 |
| POAF day                                        | 5,9764   | 6,0000   | 1,00000  | 15,0000  | 3,0000   | 7,0000   | 3,03803  | 0,269581 |
| Effective management of POAF                    | 0,9487   | 1,0000   | 0,00000  | 1,0000   | 1,0000   | 1,0000   | 0,22346  | 0,035782 |
| Hospital mortality                              | 0,0000   | 0,0000   | 0,00000  | 0,0000   | 0,0000   | 0,0000   | 0,00000  | 0,000000 |
| LOS                                             | 7,8031   | 7,0000   | 5,0000   | 15,0000  | 6,0000   | 9,0000   | 2,23266  | 0,198116 |
| Respiratory failure                             | 0,0000   | 0,0000   | 0,00000  | 0,0000   | 0,0000   | 0,0000   | 0,00000  | 0,000000 |
| Stroke                                          | 0,0000   | 0,0000   | 0,00000  | 0,0000   | 0,0000   | 0,0000   | 0,00000  | 0,000000 |
| Bleeding                                        | 0,0000   | 0,0000   | 0,00000  | 0,0000   | 0,0000   | 0,0000   | 0,00000  | 0,000000 |
| VESs                                            | 0,0000   | 0,0000   | 0,00000  | 0,0000   | 0,0000   | 0,0000   | 0,00000  | 0,000000 |
| Infectious complications of postoperative wound | 0,0000   | 0,0000   | 0,00000  | 0,0000   | 0,0000   | 0,0000   | 0,00000  | 0,000000 |

|                             |        |        |         |        |        |        |         |          |
|-----------------------------|--------|--------|---------|--------|--------|--------|---------|----------|
| Arrhythmias, except AF      | 0,0315 | 0,0000 | 0,00000 | 1,0000 | 0,0000 | 0,0000 | 0,17535 | 0,015559 |
| Pericardial puncture        | 0,0079 | 0,0000 | 0,00000 | 1,0000 | 0,0000 | 0,0000 | 0,08874 | 0,007874 |
| SVESs                       | 0,0315 | 0,0000 | 0,00000 | 1,0000 | 0,0000 | 0,0000 | 0,17535 | 0,015559 |
| AV-block                    | 0,0000 | 0,0000 | 0,00000 | 0,0000 | 0,0000 | 0,0000 | 0,00000 | 0,000000 |
| Pacemaker implantation      | 0,0000 | 0,0000 | 0,00000 | 0,0000 | 0,0000 | 0,0000 | 0,00000 | 0,000000 |
| Nausea                      | 0,1181 | 0,0000 | 0,00000 | 1,0000 | 0,0000 | 0,0000 | 0,32402 | 0,028752 |
| Vomiting                    | 0,0472 | 0,0000 | 0,00000 | 1,0000 | 0,0000 | 0,0000 | 0,21300 | 0,018901 |
| Lack of appetite            | 0,1890 | 0,0000 | 0,00000 | 1,0000 | 0,0000 | 0,0000 | 0,39304 | 0,034877 |
| Diarrhea                    | 0,1181 | 0,0000 | 0,00000 | 1,0000 | 0,0000 | 0,0000 | 0,32402 | 0,028752 |
| Abdominal pain              | 0,0157 | 0,0000 | 0,00000 | 1,0000 | 0,0000 | 0,0000 | 0,12499 | 0,011091 |
| Convulsions                 | 0,0551 | 0,0000 | 0,00000 | 1,0000 | 0,0000 | 0,0000 | 0,22911 | 0,020331 |
| Tingling in the extremities | 0,0787 | 0,0000 | 0,00000 | 1,0000 | 0,0000 | 0,0000 | 0,27040 | 0,023994 |
| Skin rashes                 | 0,0000 | 0,0000 | 0,00000 | 0,0000 | 0,0000 | 0,0000 | 0,00000 | 0,000000 |

| Colchicine n=113             |          |          |          |         |                |                |           |            |
|------------------------------|----------|----------|----------|---------|----------------|----------------|-----------|------------|
|                              | Mean     | Median   | Minimum  | Maximum | Lower Quartile | Upper Quartile | Std. Dev. | Std. Error |
| Age                          | 61,0354  | 62,0000  | 42,00000 | 76,000  | 55,0000        | 67,0000        | 8,3804    | 0,78836    |
| Male                         | 0,7345   | 1,0000   | 0,00000  | 1,000   | 0,0000         | 1,0000         | 0,4436    | 0,04173    |
| BSA                          | 2,0209   | 2,0100   | 1,53000  | 2,470   | 1,8800         | 2,1800         | 0,2145    | 0,02018    |
| Weight                       | 85,2478  | 84,0000  | 54,00000 | 120,000 | 74,0000        | 94,0000        | 15,2939   | 1,43873    |
| BMI                          | 29,1835  | 28,7300  | 21,27000 | 39,180  | 25,9600        | 31,9600        | 4,1890    | 0,39407    |
| Angina pectoris              | 0,9115   | 1,0000   | 0,00000  | 1,000   | 1,0000         | 1,0000         | 0,2853    | 0,02684    |
| Angina pectoris class III-IV | 0,5221   | 1,0000   | 0,00000  | 1,000   | 0,0000         | 1,0000         | 0,5017    | 0,04720    |
| Diabetes                     | 0,2478   | 0,0000   | 0,00000  | 1,000   | 0,0000         | 0,0000         | 0,4337    | 0,04079    |
| COPD                         | 0,0619   | 0,0000   | 0,00000  | 1,000   | 0,0000         | 0,0000         | 0,2421    | 0,02278    |
| Hypertension                 | 0,8850   | 1,0000   | 0,00000  | 1,000   | 1,0000         | 1,0000         | 0,3205    | 0,03015    |
| Prior AMI                    | 0,4071   | 0,0000   | 0,00000  | 1,000   | 0,0000         | 1,0000         | 0,4935    | 0,04642    |
| Stroke                       | 0,0177   | 0,0000   | 0,00000  | 1,000   | 0,0000         | 0,0000         | 0,1324    | 0,01246    |
| Smoking                      | 0,2212   | 0,0000   | 0,00000  | 1,000   | 0,0000         | 0,0000         | 0,4169    | 0,03922    |
| Beta-blockers                | 0,7434   | 1,0000   | 0,00000  | 1,000   | 0,0000         | 1,0000         | 0,4387    | 0,04127    |
| ACE inhibitors               | 0,6106   | 1,0000   | 0,00000  | 1,000   | 0,0000         | 1,0000         | 0,4898    | 0,04607    |
| Calcium antagonists          | 0,3274   | 0,0000   | 0,00000  | 1,000   | 0,0000         | 1,0000         | 0,4714    | 0,04434    |
| Thiazide diuretics           | 0,1239   | 0,0000   | 0,00000  | 1,000   | 0,0000         | 0,0000         | 0,3309    | 0,03113    |
| Loop diuretics               | 0,1150   | 0,0000   | 0,00000  | 1,000   | 0,0000         | 0,0000         | 0,3205    | 0,03015    |
| Potassium-sparing diuretics  | 0,2124   | 0,0000   | 0,00000  | 1,000   | 0,0000         | 0,0000         | 0,4108    | 0,03865    |
| NSAIDs                       | 0,0000   | 0,0000   | 0,00000  | 0,000   | 0,0000         | 0,0000         | 0,0000    | 0,00000    |
| Acetylsalicylic acid         | 0,3186   | 0,0000   | 0,00000  | 1,000   | 0,0000         | 1,0000         | 0,4680    | 0,04403    |
| Other antiaggregant          | 0,1947   | 0,0000   | 0,00000  | 1,000   | 0,0000         | 0,0000         | 0,3977    | 0,03741    |
| Nitrates                     | 0,2566   | 0,0000   | 0,00000  | 1,000   | 0,0000         | 1,0000         | 0,4387    | 0,04127    |
| Statins                      | 0,6814   | 1,0000   | 0,00000  | 1,000   | 0,0000         | 1,0000         | 0,4680    | 0,04403    |
| LMWHs/ UFH                   | 0,2389   | 0,0000   | 0,00000  | 1,000   | 0,0000         | 0,0000         | 0,4283    | 0,04029    |
| LVEF                         | 58,8274  | 60,0000  | 36,20000 | 72,800  | 56,0000        | 64,0000        | 6,6570    | 0,62624    |
| iESD                         | 16,9284  | 16,5000  | 11,80000 | 28,800  | 15,3465        | 18,1000        | 2,9430    | 0,29578    |
| iEDD                         | 24,7509  | 24,5192  | 17,30000 | 35,000  | 22,7723        | 26,5700        | 3,3854    | 0,34024    |
| iESV                         | 24,3914  | 22,6519  | 11,04972 | 69,900  | 18,7624        | 26,7648        | 9,5404    | 0,90149    |
| iEDV                         | 58,6904  | 56,3000  | 28,20000 | 109,600 | 48,6000        | 66,7000        | 15,6635   | 1,47350    |
| AV peak gradient             | 29,1745  | 8,0000   | 3,00000  | 134,000 | 6,0000         | 45,0000        | 36,2104   | 3,45253    |
| AV mean gradient             | 19,6250  | 6,0000   | 0,00000  | 74,000  | 3,2500         | 41,0000        | 22,2292   | 2,42541    |
| MR                           | 1,3438   | 1,5000   | 0,00000  | 2,000   | 1,0000         | 1,5000         | 0,4747    | 0,04486    |
| AR                           | 0,7336   | 1,0000   | 0,00000  | 3,000   | 0,0000         | 1,0000         | 0,8420    | 0,08140    |
| IVS                          | 13,2920  | 13,0000  | 7,00000  | 22,000  | 12,0000        | 15,0000        | 2,7829    | 0,26179    |
| LA size                      | 4,0721   | 4,0000   | 2,90000  | 5,300   | 3,8000         | 4,4000         | 0,4679    | 0,04441    |
| WBC                          | 7,6058   | 7,4590   | 3,69000  | 12,000  | 6,4000         | 8,9000         | 1,8886    | 0,17766    |
| Neutrophils                  | 4,5181   | 4,4320   | 1,90700  | 8,600   | 3,4000         | 5,4000         | 1,4901    | 0,14542    |
| Neutrophils, %               | 58,8202  | 58,0000  | 35,32000 | 89,000  | 53,0000        | 65,0000        | 8,7017    | 0,84919    |
| Platelets                    | 242,7938 | 236,0000 | 33,10000 | 398,000 | 197,0000       | 279,0000       | 64,7305   | 6,08933    |
| Creatinine                   | 86,0513  | 83,8000  | 59,90000 | 133,000 | 72,9000        | 93,6000        | 16,0573   | 1,51054    |
| eGFR                         | 94,3834  | 92,6572  | 51,46199 | 192,113 | 77,0000        | 106,4772       | 27,1726   | 2,55619    |
| Glucose                      | 5,8007   | 5,6000   | 2,80000  | 9,800   | 5,0550         | 6,4000         | 1,1328    | 0,10704    |
| AST                          | 25,0607  | 22,0000  | 10,00000 | 123,000 | 17,0000        | 27,0000        | 14,4782   | 1,39966    |
| ALT                          | 29,2187  | 23,0000  | 6,00000  | 191,000 | 16,0000        | 33,0000        | 23,3802   | 2,26025    |

|                             |          |          |          |         |         |          |         |         |
|-----------------------------|----------|----------|----------|---------|---------|----------|---------|---------|
| Potassium                   | 4,4594   | 4,4000   | 3,50000  | 5,500   | 4,1000  | 4,8000   | 0,4592  | 0,04569 |
| Intraoperative data         |          |          |          |         |         |          |         |         |
| CPB                         | 0,7611   | 1,0000   | 0,00000  | 1,000   | 1,0000  | 1,0000   | 0,4283  | 0,04029 |
| CPB time                    | 101,9195 | 105,0000 | 0,00000  | 215,000 | 75,0000 | 130,0000 | 42,5668 | 4,56364 |
| Cardioplegia                | 0,2832   | 0,0000   | 0,00000  | 1,000   | 0,0000  | 1,0000   | 0,4526  | 0,04257 |
| ACC time                    | 64,7500  | 62,5000  | 50,00000 | 127,000 | 57,0000 | 66,5000  | 13,7184 | 2,42509 |
| CABG                        | 0,8142   | 1,0000   | 0,00000  | 1,000   | 1,0000  | 1,0000   | 0,3907  | 0,03675 |
| AC - 1                      | 0,5575   | 1,0000   | 0,00000  | 1,000   | 0,0000  | 1,0000   | 0,4989  | 0,04693 |
| AC - 2                      | 0,0354   | 0,0000   | 0,00000  | 1,000   | 0,0000  | 0,0000   | 0,1856  | 0,01746 |
| AC - 3                      | 0,0000   | 0,0000   | 0,00000  | 0,000   | 0,0000  | 0,0000   | 0,0000  | 0,00000 |
| VC - 1                      | 0,3451   | 0,0000   | 0,00000  | 1,000   | 0,0000  | 1,0000   | 0,4775  | 0,04492 |
| VC - 2                      | 0,3097   | 0,0000   | 0,00000  | 1,000   | 0,0000  | 1,0000   | 0,4644  | 0,04369 |
| VC - 3                      | 0,0796   | 0,0000   | 0,00000  | 1,000   | 0,0000  | 0,0000   | 0,2720  | 0,02558 |
| VC - 4                      | 0,0265   | 0,0000   | 0,00000  | 1,000   | 0,0000  | 0,0000   | 0,1615  | 0,01519 |
| VC - 5+                     | 0,0000   | 0,0000   | 0,00000  | 0,000   | 0,0000  | 0,0000   | 0,0000  | 0,00000 |
| RCA                         | 0,3274   | 0,0000   | 0,00000  | 1,000   | 0,0000  | 1,0000   | 0,4714  | 0,04434 |
| AV repair                   | 0,2832   | 0,0000   | 0,00000  | 1,000   | 0,0000  | 1,0000   | 0,4526  | 0,04257 |
| ICU data                    |          |          |          |         |         |          |         |         |
| Cardiotonic support in ICU  | 0,4248   | 0,0000   | 0,00000  | 1,000   | 0,0000  | 1,0000   | 0,4965  | 0,04671 |
| Lung ventilation time       | 9,9750   | 8,2500   | 2,50000  | 34,400  | 5,8000  | 13,6000  | 5,7230  | 0,55070 |
| Beta-blockers               | 0,8761   | 1,0000   | 0,00000  | 1,000   | 1,0000  | 1,0000   | 0,3309  | 0,03113 |
| Statins                     | 0,7080   | 1,0000   | 0,00000  | 1,000   | 0,0000  | 1,0000   | 0,4567  | 0,04296 |
| ACE inhibitors              | 0,5929   | 1,0000   | 0,00000  | 1,000   | 0,0000  | 1,0000   | 0,4935  | 0,04642 |
| Calcium antagonists         | 0,2301   | 0,0000   | 0,00000  | 1,000   | 0,0000  | 0,0000   | 0,4228  | 0,03977 |
| Thiazide diuretics          | 0,0708   | 0,0000   | 0,00000  | 1,000   | 0,0000  | 0,0000   | 0,2576  | 0,02424 |
| Loop diuretics              | 0,1150   | 0,0000   | 0,00000  | 1,000   | 0,0000  | 0,0000   | 0,3205  | 0,03015 |
| Potassium-sparing diuretics | 0,3628   | 0,0000   | 0,00000  | 1,000   | 0,0000  | 1,0000   | 0,4830  | 0,04543 |
| NSAIDs                      | 0,4071   | 0,0000   | 0,00000  | 1,000   | 0,0000  | 1,0000   | 0,4935  | 0,04642 |
| Acetylsalicylic acid        | 0,7965   | 1,0000   | 0,00000  | 1,000   | 1,0000  | 1,0000   | 0,4044  | 0,03805 |
| Other antiaggregant         | 0,6637   | 1,0000   | 0,00000  | 1,000   | 0,0000  | 1,0000   | 0,4745  | 0,04464 |
| Nitrates                    | 0,0531   | 0,0000   | 0,00000  | 1,000   | 0,0000  | 0,0000   | 0,2252  | 0,02119 |
| Antiarrhythmic drugs        | 0,0531   | 0,0000   | 0,00000  | 1,000   | 0,0000  | 0,0000   | 0,2252  | 0,02119 |
| Cardiotonic support         | 0,4425   | 0,0000   | 0,00000  | 1,000   | 0,0000  | 1,0000   | 0,4989  | 0,04693 |
| Adrenaline                  | 0,0354   | 0,0000   | 0,00000  | 1,000   | 0,0000  | 0,0000   | 0,1856  | 0,01746 |
| Norepinephrine              | 0,2124   | 0,0000   | 0,00000  | 1,000   | 0,0000  | 0,0000   | 0,4108  | 0,03865 |
| Dopamine                    | 0,3451   | 0,0000   | 0,00000  | 1,000   | 0,0000  | 1,0000   | 0,4775  | 0,04492 |
| Dobutamine                  | 0,0177   | 0,0000   | 0,00000  | 1,000   | 0,0000  | 0,0000   | 0,1324  | 0,01246 |
| Lmwh/ UFH                   | 0,9381   | 1,0000   | 0,00000  | 1,000   | 1,0000  | 1,0000   | 0,2421  | 0,02278 |
| Warfarin                    | 0,2743   | 0,0000   | 0,00000  | 1,000   | 0,0000  | 1,0000   | 0,4482  | 0,04216 |
| Antibiotics                 | 0,9646   | 1,0000   | 0,00000  | 1,000   | 1,0000  | 1,0000   | 0,1856  | 0,01746 |
| Steroids                    | 0,6726   | 1,0000   | 0,00000  | 1,000   | 0,0000  | 1,0000   | 0,4714  | 0,04434 |
| 3 postoperative day         |          |          |          |         |         |          |         |         |
| LVEF                        | 53,9322  | 55,0000  | 28,90000 | 68,200  | 51,9250 | 56,8000  | 5,9843  | 0,58681 |
| iESV                        | 23,3117  | 19,8000  | 7,21649  | 67,000  | 16,2000 | 25,2000  | 12,2302 | 1,41223 |
| iEDV                        | 48,0020  | 44,3500  | 22,68041 | 104,500 | 39,8895 | 54,3689  | 14,2147 | 1,42147 |
| Pericardial effusion, n     | 0,0943   | 0,0000   | 0,00000  | 1,000   | 0,0000  | 0,0000   | 0,2937  | 0,02853 |

|                             |          |          |          |          |          |          |          |          |
|-----------------------------|----------|----------|----------|----------|----------|----------|----------|----------|
| Pericardial effusion, mm    | 3,3750   | 3,5000   | 2,00000  | 5,000    | 2,5000   | 4,0000   | 1,0607   | 0,37500  |
| Pleural effusion, n         | 0,4299   | 0,0000   | 0,00000  | 1,000    | 0,0000   | 1,0000   | 0,4974   | 0,04808  |
| Pleural effusion, mm        | 19,4667  | 18,0000  | 2,00000  | 60,000   | 12,0000  | 20,0000  | 10,9412  | 1,63101  |
| WBC                         | 12,0175  | 11,4000  | 5,69000  | 22,000   | 9,5000   | 14,2000  | 3,8074   | 0,35817  |
| Neutrophils                 | 58,1356  | 8,7875   | 3,43000  | 4874,000 | 6,7355   | 12,0000  | 486,4646 | 48,64646 |
| Neutrophils, %              | 76,4766  | 77,3300  | 21,30000 | 93,000   | 71,3800  | 83,9500  | 10,4887  | 1,04887  |
| Platelets                   | 199,3105 | 189,0000 | 76,00000 | 383,000  | 160,0000 | 237,0000 | 61,1678  | 5,77982  |
| Creatinine                  | 75,0651  | 71,9000  | 43,70000 | 150,0000 | 64,9000  | 81,9000  | 17,20678 | 1,648110 |
| eGFR                        | 109,0278 | 107,0000 | 57,53846 | 200,5882 | 90,1677  | 118,4615 | 29,24718 | 2,801371 |
| Glucose                     | 9,3985   | 7,0200   | 3,90000  | 99,0000  | 5,6950   | 8,6100   | 13,35961 | 1,363510 |
| AST                         | 36,4257  | 31,0000  | 12,00000 | 107,0000 | 24,0000  | 45,0000  | 19,08741 | 1,899268 |
| ALT                         | 24,3802  | 20,0000  | 6,00000  | 94,0000  | 14,0000  | 30,0000  | 16,65093 | 1,656829 |
| Potassium                   | 4,0494   | 4,1000   | 3,00000  | 5,4000   | 3,8000   | 4,3000   | 0,45462  | 0,049901 |
| Beta-blockers               | 0,8584   | 1,0000   | 0,00000  | 1,0000   | 1,0000   | 1,0000   | 0,35019  | 0,032943 |
| Statins                     | 0,7434   | 1,0000   | 0,00000  | 1,0000   | 0,0000   | 1,0000   | 0,43872  | 0,041272 |
| ACE inhibitors              | 0,5752   | 1,0000   | 0,00000  | 1,0000   | 0,0000   | 1,0000   | 0,49651  | 0,046708 |
| Calcium antagonists         | 0,2655   | 0,0000   | 0,00000  | 1,0000   | 0,0000   | 1,0000   | 0,44356  | 0,041727 |
| Thiazide diuretics          | 0,0796   | 0,0000   | 0,00000  | 1,0000   | 0,0000   | 0,0000   | 0,27195  | 0,025583 |
| Loop diuretics              | 0,1504   | 0,0000   | 0,00000  | 1,0000   | 0,0000   | 0,0000   | 0,35910  | 0,033781 |
| Potassium-sparing diuretics | 0,4071   | 0,0000   | 0,00000  | 1,0000   | 0,0000   | 1,0000   | 0,49348  | 0,046423 |
| NSAIDs                      | 0,4336   | 0,0000   | 0,00000  | 1,0000   | 0,0000   | 1,0000   | 0,49778  | 0,046827 |
| Acetylsalicylic acid        | 0,7788   | 1,0000   | 0,00000  | 1,0000   | 1,0000   | 1,0000   | 0,41693  | 0,039221 |
| Other antiaggregant         | 0,6549   | 1,0000   | 0,00000  | 1,0000   | 0,0000   | 1,0000   | 0,47753  | 0,044922 |
| Nitrates                    | 0,0088   | 0,0000   | 0,00000  | 1,0000   | 0,0000   | 0,0000   | 0,09407  | 0,008850 |
| Antiarrhythmic drugs        | 0,1062   | 0,0000   | 0,00000  | 1,0000   | 0,0000   | 0,0000   | 0,30946  | 0,029111 |
| Cardiotonic support         | 0,2566   | 0,0000   | 0,00000  | 1,0000   | 0,0000   | 1,0000   | 0,43872  | 0,041272 |
| Adrenaline                  | 0,0088   | 0,0000   | 0,00000  | 1,0000   | 0,0000   | 0,0000   | 0,09407  | 0,008850 |
| Norepinephrine              | 0,1239   | 0,0000   | 0,00000  | 1,0000   | 0,0000   | 0,0000   | 0,33093  | 0,031131 |
| Dopamine                    | 0,1947   | 0,0000   | 0,00000  | 1,0000   | 0,0000   | 0,0000   | 0,39773  | 0,037415 |
| Dobutamine                  | 0,0177   | 0,0000   | 0,00000  | 1,0000   | 0,0000   | 0,0000   | 0,13244  | 0,012459 |
| Lmwh/ UFH                   | 0,8053   | 1,0000   | 0,00000  | 1,0000   | 1,0000   | 1,0000   | 0,39773  | 0,037415 |
| Warfarin                    | 0,2743   | 0,0000   | 0,00000  | 1,0000   | 0,0000   | 1,0000   | 0,44817  | 0,042160 |
| Antibiotics                 | 0,4513   | 0,0000   | 0,00000  | 1,0000   | 0,0000   | 1,0000   | 0,49984  | 0,047021 |
| Steroids                    | 0,2920   | 0,0000   | 0,00000  | 1,0000   | 0,0000   | 1,0000   | 0,45672  | 0,042965 |
| 5 postoperative day         |          |          |          |          |          |          |          |          |
| LVEF                        | 54,7355  | 55,6000  | 31,60000 | 66,3000  | 53,0000  | 58,0000  | 5,55148  | 0,536682 |
| iESV                        | 21,7333  | 19,7000  | 9,30000  | 63,7000  | 16,2000  | 23,4000  | 10,14194 | 1,126883 |
| iEDV                        | 48,1735  | 45,2500  | 22,20000 | 106,0000 | 38,3000  | 53,3000  | 15,93053 | 1,609226 |
| Pericardial effusion, n     | 0,2037   | 0,0000   | 0,00000  | 1,0000   | 0,0000   | 0,0000   | 0,40463  | 0,038935 |
| Pericardial effusion, mm    | 6,2727   | 5,0000   | 2,00000  | 40,0000  | 3,0000   | 6,0000   | 7,92333  | 1,689260 |
| Pleural effusion, n         | 0,4312   | 0,0000   | 0,00000  | 2,0000   | 0,0000   | 1,0000   | 0,51581  | 0,049405 |
| Pleural effusion, mm        | 19,3636  | 19,5000  | 3,00000  | 40,0000  | 10,0000  | 26,0000  | 9,06589  | 1,366734 |



|                                                 |          |          |          |          |          |          |          |          |
|-------------------------------------------------|----------|----------|----------|----------|----------|----------|----------|----------|
| WBC                                             | 9,6896   | 9,3000   | 4,60000  | 21,3000  | 8,0000   | 11,1000  | 2,73540  | 0,259632 |
| Neutrophils                                     | 6,2205   | 5,9610   | 2,40000  | 12,4600  | 4,7000   | 7,5260   | 2,20923  | 0,232873 |
| Neutrophils, %                                  | 63,5010  | 62,0000  | 40,10000 | 87,9500  | 58,6000  | 68,9000  | 9,19176  | 0,974325 |
| Platelets                                       | 263,0360 | 265,4000 | 33,30000 | 529,8000 | 211,0000 | 314,1000 | 82,96773 | 7,874948 |
| Creatinine                                      | 76,9981  | 75,3500  | 39,40000 | 120,7000 | 68,0000  | 83,1000  | 14,84451 | 1,441827 |
| eGFR                                            | 104,4717 | 102,7991 | 52,88889 | 194,3898 | 85,3373  | 119,2798 | 28,21409 | 2,740395 |
| Glucose                                         | 6,8399   | 6,3650   | 4,14000  | 15,1600  | 5,2500   | 7,4000   | 2,41257  | 0,260154 |
| AST                                             | 32,0724  | 28,0000  | 11,00000 | 160,5000 | 22,0000  | 34,1000  | 19,48826 | 1,901859 |
| ALT                                             | 32,7610  | 28,0000  | 6,00000  | 138,0000 | 20,0000  | 42,0000  | 20,03569 | 1,955283 |
| Potassium                                       | 4,1179   | 4,1500   | 3,00000  | 5,3000   | 3,7000   | 4,4000   | 0,46284  | 0,052406 |
| Beta-blockers                                   | 0,8850   | 1,0000   | 0,00000  | 1,0000   | 1,0000   | 1,0000   | 0,32050  | 0,030150 |
| Statins                                         | 0,7434   | 1,0000   | 0,00000  | 1,0000   | 0,0000   | 1,0000   | 0,43872  | 0,041272 |
| ACE inhibitors                                  | 0,5841   | 1,0000   | 0,00000  | 1,0000   | 0,0000   | 1,0000   | 0,49508  | 0,046573 |
| Calcium antagonists                             | 0,2478   | 0,0000   | 0,00000  | 1,0000   | 0,0000   | 0,0000   | 0,43365  | 0,040794 |
| Thiazide diuretics                              | 0,0796   | 0,0000   | 0,00000  | 1,0000   | 0,0000   | 0,0000   | 0,27195  | 0,025583 |
| Loop diuretics                                  | 0,1770   | 0,0000   | 0,00000  | 1,0000   | 0,0000   | 0,0000   | 0,38336  | 0,036064 |
| Potassium-sparing diuretics                     | 0,4336   | 0,0000   | 0,00000  | 1,0000   | 0,0000   | 1,0000   | 0,49778  | 0,046827 |
| NSAIDs                                          | 0,3894   | 0,0000   | 0,00000  | 1,0000   | 0,0000   | 1,0000   | 0,48978  | 0,046075 |
| Acetylsalicylic acid                            | 0,8230   | 1,0000   | 0,00000  | 1,0000   | 1,0000   | 1,0000   | 0,38336  | 0,036064 |
| Other antiaggregant                             | 0,6903   | 1,0000   | 0,00000  | 1,0000   | 0,0000   | 1,0000   | 0,46444  | 0,043691 |
| Nitrates                                        | 0,0000   | 0,0000   | 0,00000  | 0,0000   | 0,0000   | 0,0000   | 0,00000  | 0,000000 |
| Antiarrhythmic drugs                            | 0,0796   | 0,0000   | 0,00000  | 1,0000   | 0,0000   | 0,0000   | 0,27195  | 0,025583 |
| Cardiotonic support                             | 0,0885   | 0,0000   | 0,00000  | 1,0000   | 0,0000   | 0,0000   | 0,28528  | 0,026837 |
| Adrenaline                                      | 0,0088   | 0,0000   | 0,00000  | 1,0000   | 0,0000   | 0,0000   | 0,09407  | 0,008850 |
| Norepinephrine                                  | 0,0265   | 0,0000   | 0,00000  | 1,0000   | 0,0000   | 0,0000   | 0,16148  | 0,015190 |
| Dopamine                                        | 0,0619   | 0,0000   | 0,00000  | 1,0000   | 0,0000   | 0,0000   | 0,24213  | 0,022778 |
| Dobutamine                                      | 0,0177   | 0,0000   | 0,00000  | 1,0000   | 0,0000   | 0,0000   | 0,13244  | 0,012459 |
| Lmwh/ UFH                                       | 0,6549   | 1,0000   | 0,00000  | 1,0000   | 0,0000   | 1,0000   | 0,47753  | 0,044922 |
| Warfarin                                        | 0,2743   | 0,0000   | 0,00000  | 1,0000   | 0,0000   | 1,0000   | 0,44817  | 0,042160 |
| Antibiotics                                     | 0,2920   | 0,0000   | 0,00000  | 1,0000   | 0,0000   | 1,0000   | 0,45672  | 0,042965 |
| Steroids                                        | 0,1593   | 0,0000   | 0,00000  | 1,0000   | 0,0000   | 0,0000   | 0,36758  | 0,034579 |
| Outcomes                                        |          |          |          |          |          |          |          |          |
| POAF                                            | 0,1858   | 0,0000   | 0,00000  | 1,0000   | 0,0000   | 0,0000   | 0,39071  | 0,036755 |
| POAF day                                        | 6,6283   | 7,0000   | 1,00000  | 15,0000  | 6,0000   | 7,0000   | 2,61245  | 0,245759 |
| Effective management of POAF                    | 1,0000   | 1,0000   | 1,00000  | 1,0000   | 1,0000   | 1,0000   | 0,00000  | 0,000000 |
| Hospital mortality                              | 0,0000   | 0,0000   | 0,00000  | 0,0000   | 0,0000   | 0,0000   | 0,00000  | 0,000000 |
| LOS                                             | 7,6071   | 7,0000   | 5,00000  | 15,000   | 7,0000   | 8,0000   | 1,7571   | 0,16603  |
| Respiratory failure                             | 0,0000   | 0,0000   | 0,00000  | 0,0000   | 0,0000   | 0,0000   | 0,00000  | 0,000000 |
| Stroke                                          | 0,0000   | 0,0000   | 0,00000  | 0,0000   | 0,0000   | 0,0000   | 0,00000  | 0,000000 |
| Bleeding                                        | 0,0000   | 0,0000   | 0,00000  | 0,0000   | 0,0000   | 0,0000   | 0,00000  | 0,000000 |
| VESs                                            | 0,0088   | 0,0000   | 0,00000  | 1,0000   | 0,0000   | 0,0000   | 0,09407  | 0,008850 |
| Infectious complications of postoperative wound | 0,0000   | 0,0000   | 0,00000  | 0,0000   | 0,0000   | 0,0000   | 0,00000  | 0,000000 |

|                             |        |        |         |        |        |        |         |          |
|-----------------------------|--------|--------|---------|--------|--------|--------|---------|----------|
| Arrhythmias, except AF      | 0,0354 | 0,0000 | 0,00000 | 1,0000 | 0,0000 | 0,0000 | 0,18561 | 0,017460 |
| Pericardial puncture        | 0,0000 | 0,0000 | 0,00000 | 0,0000 | 0,0000 | 0,0000 | 0,00000 | 0,000000 |
| SVESs                       | 0,0088 | 0,0000 | 0,00000 | 1,0000 | 0,0000 | 0,0000 | 0,09407 | 0,008850 |
| AV-block                    | 0,0265 | 0,0000 | 0,00000 | 1,0000 | 0,0000 | 0,0000 | 0,16148 | 0,015190 |
| Pacemaker implantation      | 0,0265 | 0,0000 | 0,00000 | 1,0000 | 0,0000 | 0,0000 | 0,16148 | 0,015190 |
| Nausea                      | 0,1239 | 0,0000 | 0,00000 | 1,0000 | 0,0000 | 0,0000 | 0,33093 | 0,031131 |
| Vomiting                    | 0,0177 | 0,0000 | 0,00000 | 1,0000 | 0,0000 | 0,0000 | 0,13244 | 0,012459 |
| Lack of appetite            | 0,1681 | 0,0000 | 0,00000 | 1,0000 | 0,0000 | 0,0000 | 0,37566 | 0,035339 |
| Diarrhea                    | 0,2566 | 0,0000 | 0,00000 | 1,0000 | 0,0000 | 1,0000 | 0,43872 | 0,041272 |
| Abdominal pain              | 0,0708 | 0,0000 | 0,00000 | 1,0000 | 0,0000 | 0,0000 | 0,25763 | 0,024236 |
| Convulsions                 | 0,0177 | 0,0000 | 0,00000 | 1,0000 | 0,0000 | 0,0000 | 0,13244 | 0,012459 |
| Tingling in the extremities | 0,0796 | 0,0000 | 0,00000 | 1,0000 | 0,0000 | 0,0000 | 0,27195 | 0,025583 |
| Skin rashes                 | 0,0000 | 0,0000 | 0,00000 | 0,0000 | 0,0000 | 0,0000 | 0,00000 | 0,000000 |
